# Supplementary material for: Optimal design of a biofuel supply chain using an augmented multi-objective and TOPSIS method
Source: Royal Society of Chemistry journal article supplement (doi:10.1039/d2gc04670a), 2023-01-01
Supplement: d2gc04670a1.pdf [file d2gc04670a1.pdf]

## Electronic supplementary information -- Optimal Design of a Biofuel Supply Chain Using an Augmented Multi-Objective and TOPSIS Method

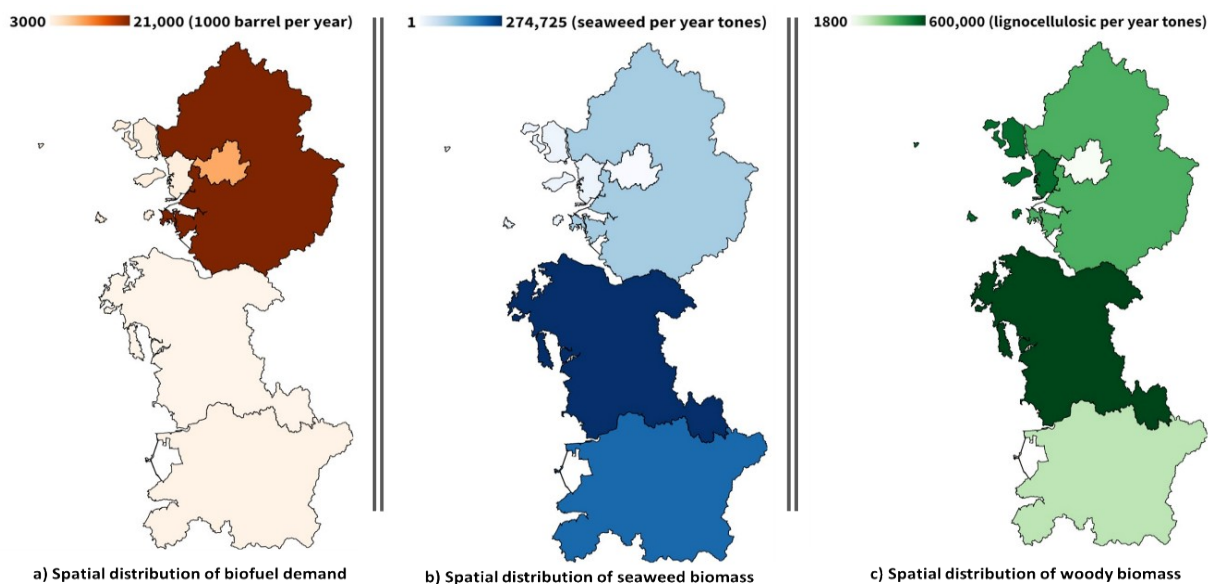

Figure I. Spatial distribution of biomass resources and biofuel demand in Korea.

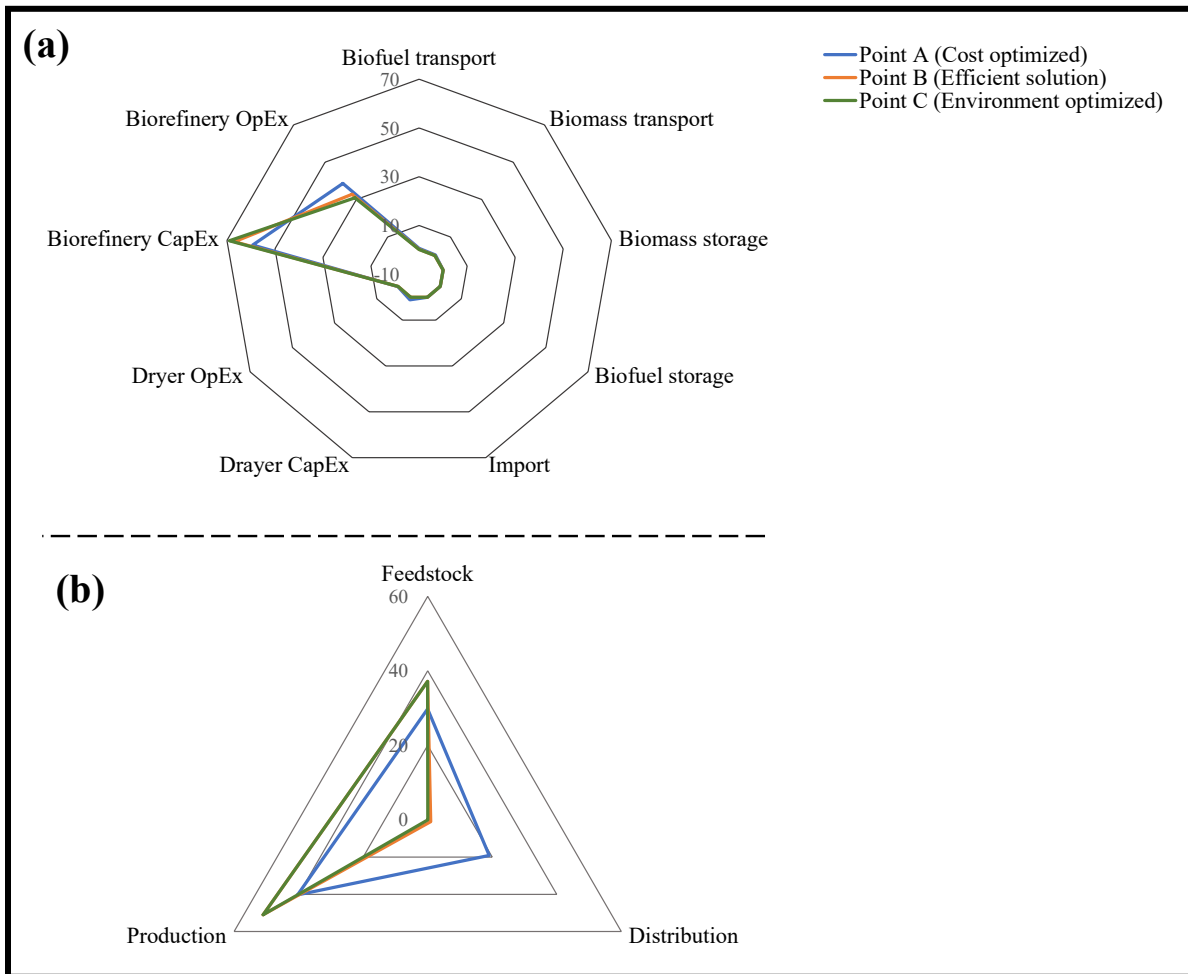

Figure II. Radar diagram of the pay-off table (values based on percentage).

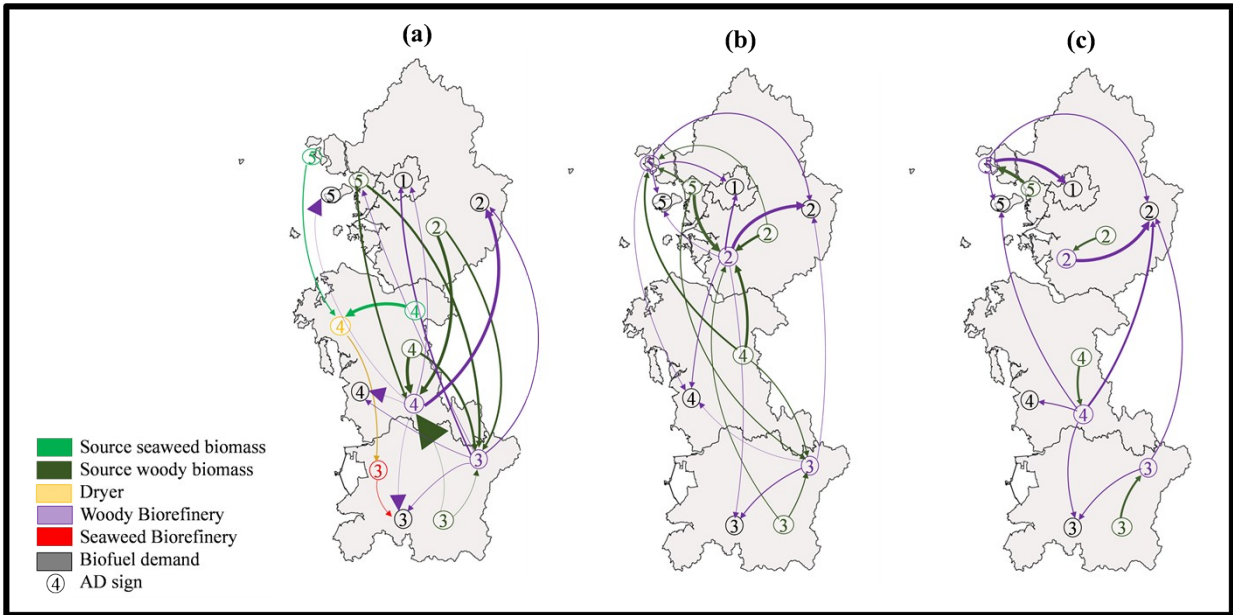

Figure III. Supply chain configuration at the end of time horizon under (a) economic, (b) efficient, and (c) environmental optimization.

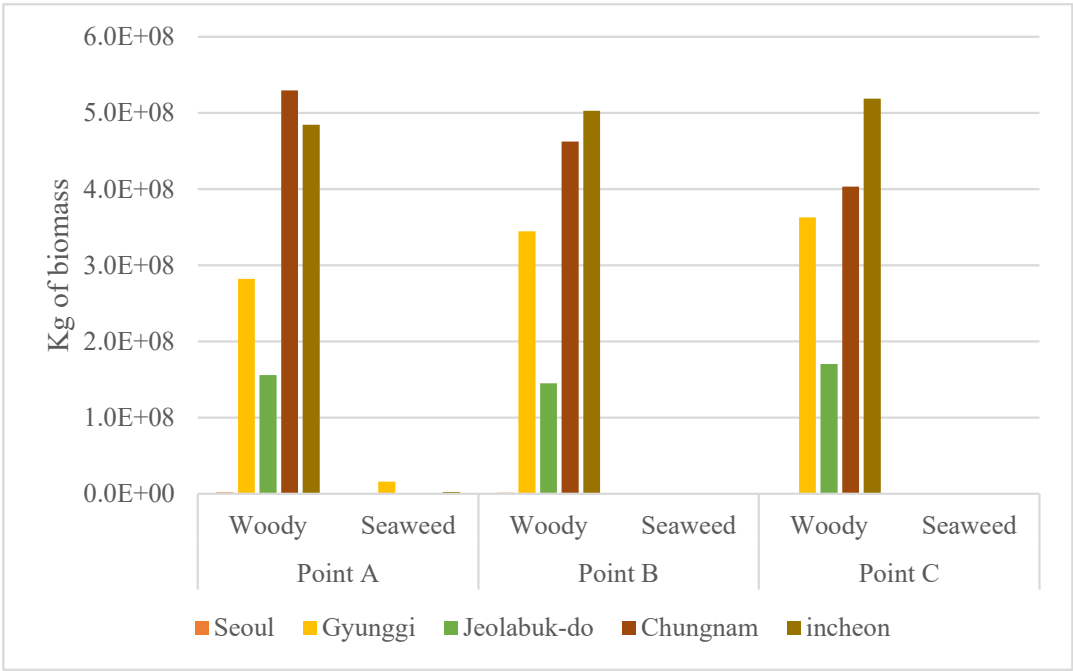

Figure IV. Amounts of seaweed and woody biomasses at each point.

Table I. Land information of ADs.

|             | Land cost<br>(\$/m <sup>2</sup> ) | Demand<br>(1000 barrel/year) | Woody biomass<br>(tones/year) | Algae biomass<br>(tones/year) |
|-------------|-----------------------------------|------------------------------|-------------------------------|-------------------------------|
| Seoul       | 8623.7                            | 9,998                        | 1874.1667                     | 0                             |
| Gyunggi     | 640.2402                          | 21,387                       | 363093.76                     | 95210                         |
| Jeolabuk-do | 102.8363                          | 3,325                        | 170335.05                     | 214145                        |
| Gyeongnam   | 181.6263                          | 5,914                        | 597093.03                     | 34915                         |
| incheon     | 1184.971                          | 3,891                        | 361089.2                      | 14045                         |

Table II. Distance between ADs (km).

|             | Seoul | Gyunggi | Jeolabuk-<br>do | Gyeongnam | incheon |
|-------------|-------|---------|-----------------|-----------|---------|
| Seoul       | 1     | 46      | 217             | 379       | 37      |
| Gyunggi     | 46    | 1       | 189             | 355       | 45      |
| Jeolabuk-do | 217   | 189     | 1               | 222       | 226     |
| Gyeongnam   | 379   | 355     | 222             | 1         | 392     |
| incheon     | 37    | 45      | 226             | 392       | 1       |

Table III. Dryer specifications.

| maximum<br>capacity<br>(dry tons/year) | fixed cost<br>(1000 dollar) |
|----------------------------------------|-----------------------------|
| 0.002                                  | 0.53                        |
| 0.017                                  | 4.28                        |
| 0.138                                  | 34.22                       |
| 1.104                                  | 273.75                      |
| 7.500                                  | 2190.03                     |

Table IV. Biomass storage specifications.

| Capacity<br>(tones of biomass/month) | Fixed cost<br>(1000 \$) |
|--------------------------------------|-------------------------|
| 5                                    | 1.25                    |
| 20                                   | 2.50                    |
| 160                                  | 6.67                    |
| 2560                                 | 106.67                  |
| 81920                                | 3413.33                 |

Table V. Biorefinery specifications.

|                                        | Capacity (MGY) | Fixed cost (million \$) | Operational cost (million \$/year) |
|----------------------------------------|----------------|-------------------------|------------------------------------|
| 3 <sup>rd</sup> generation biorefinery | 10             | 2.57                    | 0.26                               |
|                                        | 20             | 6.83                    | 0.80                               |
|                                        | 30             | 10.19                   | 1.35                               |
|                                        | 40             | 12.85                   | 2.08                               |
|                                        | 50             | 14.67                   | 2.59                               |
|                                        | 100            | 25.76                   | 4.92                               |
| 2 <sup>nd</sup> generation biorefinery | 10             | 8.51                    | 0.57                               |
|                                        | 20             | 12.91                   | 1.14                               |
|                                        | 50             | 22.36                   | 2.85                               |
|                                        | 90             | 31.80                   | 5.1                                |
|                                        | 133            | 39.60                   | 7.4                                |
|                                        | 164            | 44.50                   | 8.9                                |

Table VI. Biofuel storage specifications.

| Volume(m <sup>3</sup> ) | fixed cost (\$) |
|-------------------------|-----------------|
| 2000                    | 80041.645       |
| 3000                    | 104177.83       |
| 4000                    | 125598.8        |
| 5000                    | 145203.48       |
| 6000                    | 163472.54       |

Table VII. transportation cost parameters.

|                                                                       |              |
|-----------------------------------------------------------------------|--------------|
| Biomass transportation with a capacity of 6.37 m <sup>3</sup> (1 ton) | \$ 0.318/km  |
| Biofuel transportation                                                | \$ 381/truck |
|                                                                       | \$ 457/truck |
|                                                                       | \$ 609/truck |

Table VIII. Environmental parameters (CO<sub>2</sub>-equiv/kg).

|                                            |                            |
|--------------------------------------------|----------------------------|
| GHG emission of cultivating and harvesting | 0.136 (Algae) / 35 (Woody) |
| GHG emission of transporting biofuel       | 75                         |
| GHG emission of transporting biomass       | 75                         |
| GHG emission of producing biofuel          | 92.88                      |
| GHG emission of drying biomass             | 27.5                       |

## Nomenclature

### Indices

|    |                                   |
|----|-----------------------------------|
| b  | Set of biomass feedstocks         |
| H  | Set of conversion technologies    |
| d  | Set of dryers                     |
| ld | Capacity level of dryer           |
| K  | Set of biorefineries              |
| q  | Set of conversion technologies    |
| lr | Capacity level of biorefinery     |
| m  | Set of transportation modes       |
| t  | Set of time periods               |
| f  | Set of biofuel storage facilities |

|           |                                                                            |
|-----------|----------------------------------------------------------------------------|
| nf        | Capacity level of biofuel storage                                          |
| ng        | capacity level of biomass storage                                          |
| j         | Set of demands                                                             |
| $\hat{j}$ | Set of demands (using for transportation between administrative divisions) |

#### Parameters

|     |                                                     |
|-----|-----------------------------------------------------|
| CRF | Capital recovery factor                             |
| CBD | Fixed cost of a dryer (\$ million)                  |
| lc  | Land cost (\$ million)                              |
| FCI | Fixed cost of biorefinery facility (\$ million)     |
| HSB | Fixed cost of biomass storage facility (\$ million) |
| ECB | Fixed cost of biofuel storage facility (\$ million) |
| MBD | Unit operating cost of dryer (\$ million/kg)        |
| CPD | Coefficient of biofuel production (\$ million/kg)   |
| COL | Cost of manufacturing (\$ million/kg of biofuel)    |
| CUT | Cost of labor (\$ million/kg of biofuel)            |

|             |                                                                             |
|-------------|-----------------------------------------------------------------------------|
| CRM         | Cost of utilities (\$ million)                                              |
| TM          | Unit transportation cost of biomass (\$ million/km/vehicle)                 |
| TB          | Unit transportation cost of biofeul (\$ million km/vehicle)                 |
| DS          | Distance (km)                                                               |
| <i>EHV</i>  | Unit GHG emission of cultivating and harvesting (CO <sub>2</sub> -equiv/kg) |
| <i>ETR</i>  | Unit GHG emission of transporting biofuel (CO <sub>2</sub> -equiv/kg)       |
| <i>ETRB</i> | Unit GHG emission of transporting biomass (CO <sub>2</sub> -equiv/kg)       |
| <i>EPD</i>  | Unit GHG emission of producing biofuel (CO <sub>2</sub> -equiv/kg)          |
| <i>EDR</i>  | Unit GHG emission of drying biomass (CO <sub>2</sub> -equiv/kg)             |
| BA          | Biomass available (kg/month)                                                |
| Dem         | Demand (kg/month)                                                           |
|             | Maximum number of facilities in administrative divisions                    |
|             | Biomass storage capacity (kg/month)                                         |
|             | Biofuel storage capacity (kg/month)                                         |
|             | Capacity of biorefinery (kg/month)                                          |
|             | Capacity of a dryer (kg/month)                                              |



Continuous variables

|            |                                                                     |
|------------|---------------------------------------------------------------------|
| harv       | Harvested biomass (kg/month)                                        |
| fhd        | Biomass from harvesting site to a dryer (kg)                        |
| fhrw       | Biomass from harvesting site to biorefinery (kg)                    |
| fhcw       | Biomass from harvesting site to storage (kg)                        |
| fhr        | Biomass from dryer to biorefinery (kg)                              |
| feed       | Biomass aggregation from all pathways (kg)                          |
| fc         | Biofuel produced (kg)                                               |
| frb        | Biofuel from biorefinery to demand (kg)                             |
| fst        | Biofuel from biorefinery to storage (kg)                            |
| frs        | Biofuel from storage to demand (kg)                                 |
| $l$        | Inventory level of biofuel at the end of the time period (kg)       |
| $l$        | Inventory level of biofuel at the beginning of the time period (kg) |
| $^{1s}$    | Inventory level of biomass at the beginning of the time period (kg) |
| $^{1s}$    | Inventory level of biomass at the end of the time period (kg)       |
| <i>imp</i> | Biofuel import (kg)                                                 |

|                      |                                                                      |
|----------------------|----------------------------------------------------------------------|
| $C_{dry}^{fix}$      | Fixed cost of a dryer (\$ million)                                   |
| $C_{dry}^{Opex}$     | Operational cost of dryer (\$ million)                               |
| $C_{brf}^{Capex}$    | Fixed cost of biorefinery (\$ million)                               |
| $C_{brf}^{Opex}$     | Operational cost of biorefinery (\$ million)                         |
| $C_{bfuel\ strg}$    | Fixed cost of biofuel storage (\$ million)                           |
| $C_{bmss\ strg}$     | Fixed cost of biomass storage (\$ million)                           |
| $C_{bfuel\ trnsprt}$ | Biofuel transportation cost (\$ million)                             |
| $C_{bmss\ trnsprt}$  | Biomass transportation cost (\$ million)                             |
| $C_{imprt}$          | Import cost (\$ million)                                             |
| $E_{acq}$            | GHG emission of biomass acquisition                                  |
| $E_{bfuel\ trnsprt}$ | GHG emission of biofuel transportation (CO <sub>2</sub> -equiv/year) |
| $E_{bmss\ trnsprt}$  | GHG emission of biomass transportation (CO <sub>2</sub> -equiv/year) |
| $E_{prod}$           | GHG emission of biofuel production (CO <sub>2</sub> -equiv/year)     |

Integer variables

|   |                         |
|---|-------------------------|
| w | Number of dryers        |
| v | Number of biorefineries |

x            Number of biomass storage facilities

z            Number of biofuel storage facilities

n            Number of transit vehicles facilities
